# Supplementary material
Source: Springer Nature journal article supplement (https://www.springermedizin.de/resource/supplementary/12884_2008_200_MOESM2_ESM.pdf/9459866)

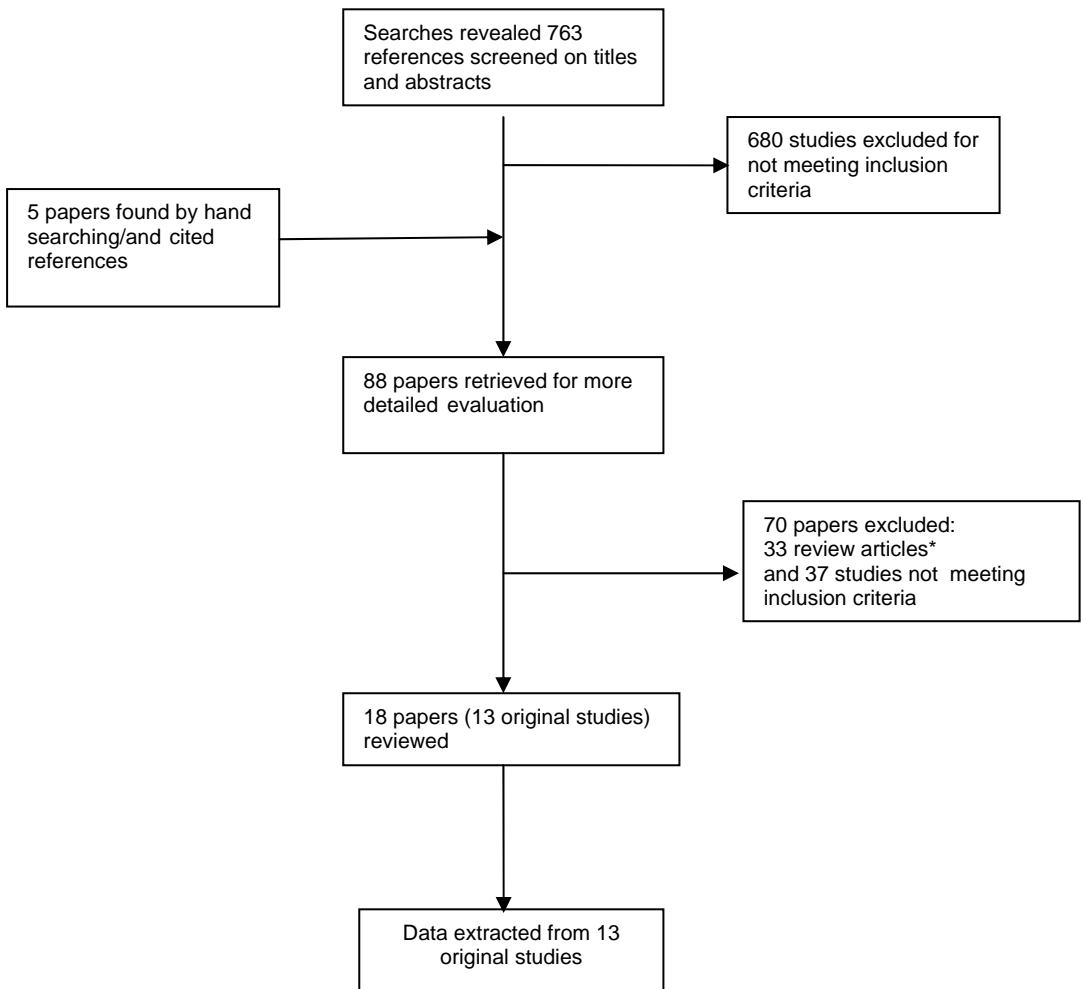

\*Reviews of antenatal care included two studies with no published maternal mortality data

Supplement: MOESM2 [file 9459866]
